# Supplementary material for: Gene-diet interactions associated with complex trait variation in an advanced intercross outbred mouse line
Source: PubMed Central journal article supplement (PMC6736984; doi:10.1038/s41467-019-11952-w), 2019-09-10
Supplement: 41467_2019_11952_MOESM4_ESM.pdf [file 41467_2019_11952_MOESM4_ESM.pdf]

## Description of Additional Supplementary Files

**File Name:** Supplementary Data 1

**Description:** Supplementary Data 1 contains a list of genome-wide identified QTL ( $\alpha_{gw} < 0.05$ ) relevant for figure 1.

**File Name:** Supplementary Data 2

**Description:** Supplementary Data 2 contains a list of chromosome-wide identified QTL ( $\alpha_{cw} < 0.05$ ) relevant for figure 1.

**File Name:** Supplementary Data 3

**Description:** Supplementary Data 3 summarizes SNPs and indels data from the whole genome sequencing of the four founder strains used in this study (NZM2410/J, MRL/MpJ, BxD2/TyJ, and CAST/EiJ).

**File Name:** Supplementary Data 4

**Description:** Supplementary Data 4 contains a list of differentially expressed genes in spleens of mice when stratified by diet relevant for figure 4.

**File Name:** Supplementary Data 5

**Description:** Supplementary Data 5 contains a list of differentially expressed genes in spleens of healthy vs. diseased mice relevant for figure 4.

**File Name:** Supplementary Data 6

**Description:** Supplementary Data 6 contains a list of pathways enriched in spleens of mice set on different diets and based on the presence or absence of disease relevant for figure 4.

**File Name:** Supplementary Data 7

**Description:** Supplementary Data 7 contains a list of FMC1-associated genes relevant to figure 4.

**File Name:** Supplementary Data 8

**Description:** Supplementary Data 8 contains a list of FFC4-associated genes relevant to figure 4.

**File Name:** Supplementary Data 9

**Description:** Supplementary Data 9 a list of differentially expressed genes in spleens of ANA positive vs. ANA negative NZM2410/J mice relevant to figure 5.

**File Name:** Supplementary Data 10

**Description:** Supplementary Data 10 contains a list of differentially expressed genes in spleens of mice set on calorie-restricted diet vs. NZM2410/J mice set on control and western diets relevant for figure 5.

**File Name:** Supplementary Data 11

**Description:** Supplementary Data 11 a list of FMC3-associated genes relevant to figure 5.

**File Name:** Supplementary Data 12

**Description:** Supplementary Data 12 contains a list of FMC5-associated genes relevant to figure 5.

**File Name:** Supplementary Data 13

**Description:** Supplementary Data 13 contains a list of FFC6-associated genes relevant to figure 5.
